# Supplementary material
Source: PubMed Central journal article supplement (PMC3008233)
Supplement: supp_76_24_7972__1.pdf [file supp_76_24_7972__1.pdf]

**Table S1:** Primers used.

---

| Primer        | Sequence                                                                |
|---------------|-------------------------------------------------------------------------|
| lolB1         | 5' GCG GCA AGG CGA AGA TTT CC 3'                                        |
| lolB2         | 5' GAG GCG GTG ATA ATA GGT CTC 3'                                       |
| lolC1         | 5' GCA GCC GCC TTG TCG ACT GGC CG 3'                                    |
| lolC2         | 5' GAT CAC GGC GTC GAT CGC AGC 3'                                       |
| lolD3         | 5' GCT GAC GGA TCC TGC CGA TTG C 3'                                     |
| lolD4         | 5' CGG CCT GCG TCT CGA GGA CCG G 3'                                     |
| lolE3         | 5' GCT GGC AGT CGA CCA ACC TCC TG 3'                                    |
| lolE4         | 5' GTG GTG GTG GTA GAC GAG ATC GAC 3'                                   |
| 63Nru1F       | 5' CGA CTA <u>G</u> IC ATT GCA GCG ATA GAA CGG 3'                       |
| 63Nru1R       | 5' CTA TTT <u>C</u> GT CGA GCA CAG ACG AGG GCC TG 3'                    |
| PKiolCFPstI   | 5' CGA ATC <u>C</u> TG CAG GGT CTG GTT CGA AC '3                        |
| PKiolCRBamHI  | 5' CGG TAG GTC <u>G</u> GG <u>A</u> TC CTT TCG CGA AC '3                |
| PKiolDFNsiI   | 5' CGG TCG ACC <u>A</u> AT GCA TCA AGG TGC TTT C '3                     |
| PKiolDFBgIII  | 5' CGA GAC GAA GAC GAG ATC <u>A</u> G <u>A</u> <u>T</u> CT TGA GAG C '3 |
| FiolE-NsiI    | 5' GCA ACA GAG CGA <u>I</u> GC ATC CGC CTT AAG '3                       |
| RiolE-BamHI   | 5' GCA GCC <u>G</u> GA TCC GGG GGC AAT TAC G '3                         |
| FiolB-NsiI    | 5' CGG GGA <u>G</u> AA <u>T</u> GC <u>A</u> TA CCA CAG AAA CCC '3       |
| 2PKiolBRBgIII | 5' CGG CAA GAT <u>C</u> TG ATA GGG CGA AGG CTC '3                       |

---

Underlined bases were modified.

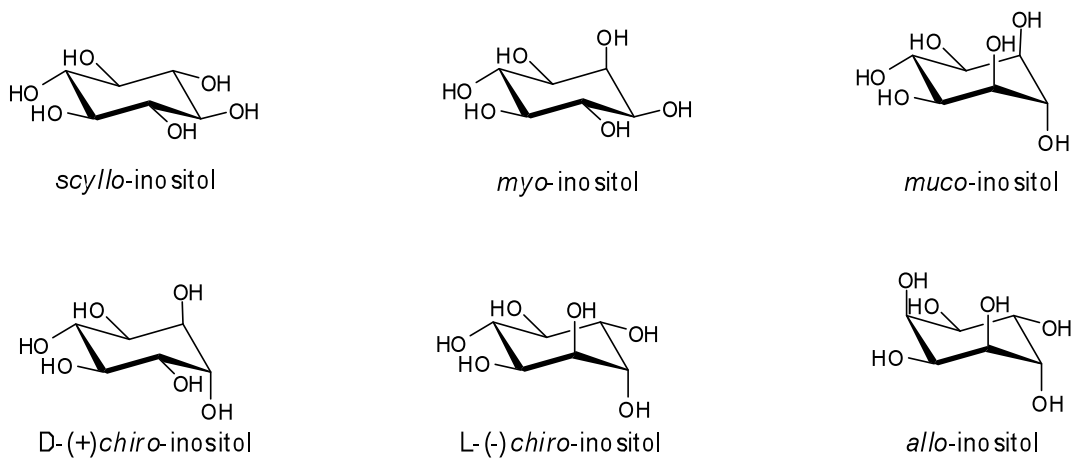

Fig. S1: Inositol isomers used in this study.

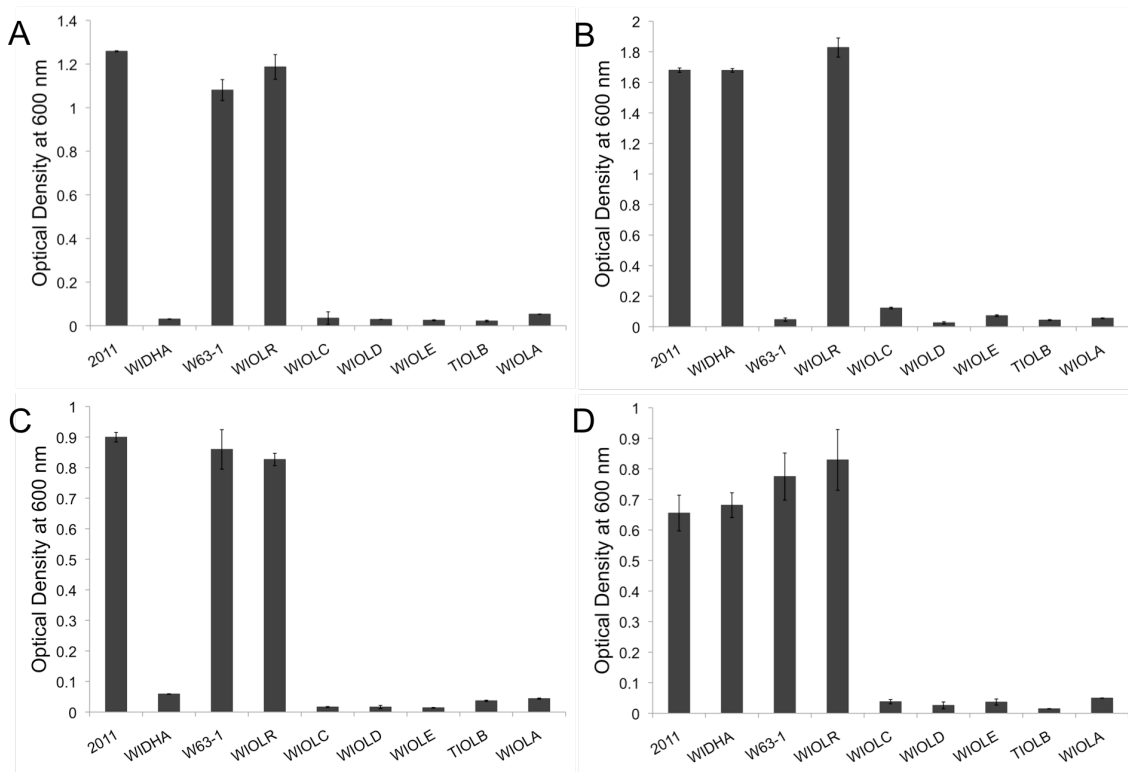

Fig. S2: Growth of *S. meliloti* wild-type strain 2011 and the corresponding *idhA* (WIDHA), *smc01163* (W63-1), *iolR* (WIOLR), *iolC* (WIOLC), *iolD* (WIOLD), *iolE* (WIOLE) and *iolA* (WIOLA) mutants, as well as the *S. meliloti* 1021 derived *iolB* (TIOLB) mutant in minimal medium with 0.2% *myo*-inositol (A), *scyllo*-inositol (B), *D-chiro*-inositol (C), and 2-keto-*myo*-inositol (2KMI; D) as sole carbon sources. The optical density was determined spectrophotometrically at 600 nm after 72 hours. Bars represent the average of two independent experiments, each performed in duplicate. Error bars denote  $\pm$  SEM.

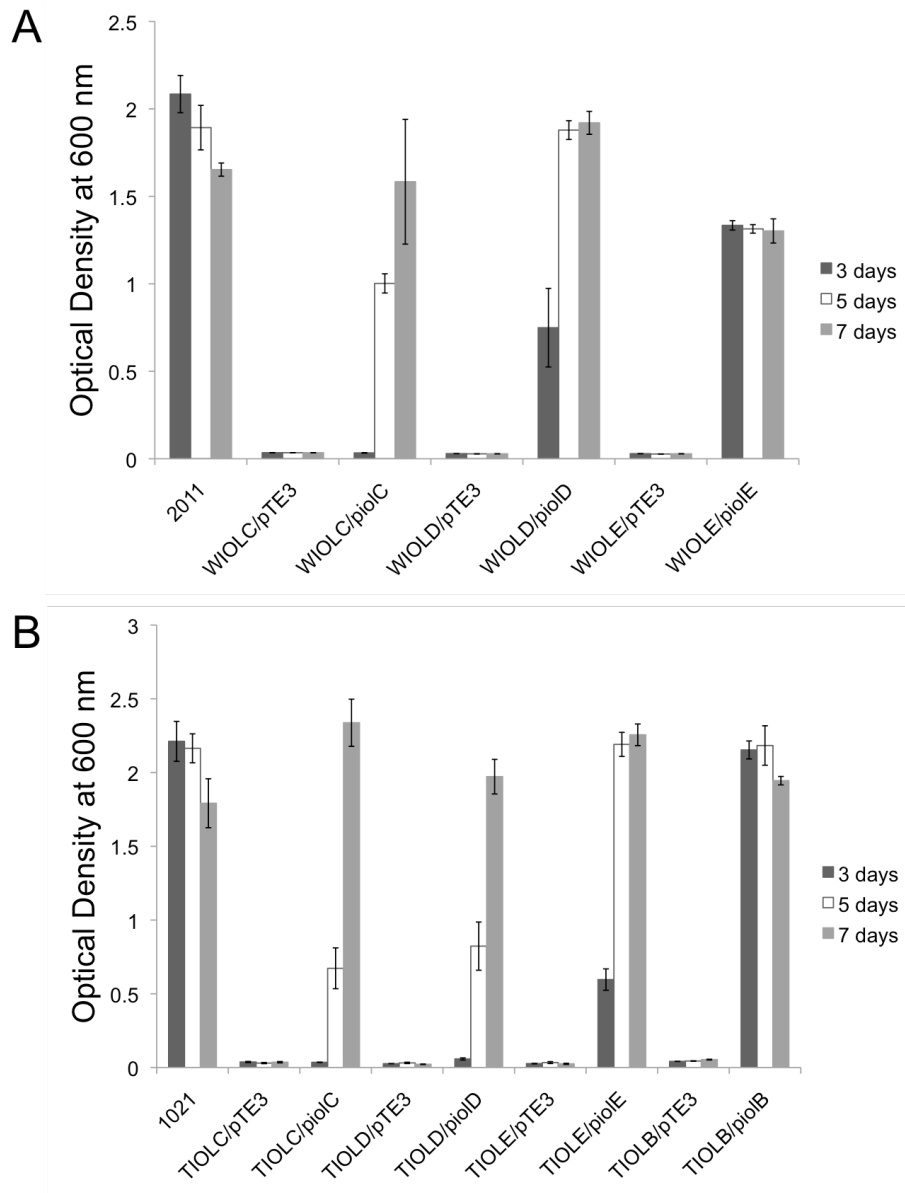

Fig. S3: Growth of *S. meliloti* wild-type strains 2011 (A) and 1021 (B) and their respective complemented *iolC* (WIOLC/p*iolC*; TIOLC/p*iolC*), *iolD* (WIOLD/p*iolD*; TIOLD/p*iolD*), *iolE* (WIOLE/p*iolE*; TIOLE/p*iolE*) and *iolB* (TIOLB/p*iolB*) mutants in minimal medium with 0.2% *myo*-inositol as sole carbon source, supplemented with kanamycin and tetracycline. Mutant strains harboring the vector (WIOLC/pTE3; TIOLC/pTE3); WIOLD/pTE3; TIOLD/pTE3; WIOLE/pTE3; TIOLE/pTE3; TIOLB/pTE3) served as control. The optical density was determined spectrophotometrically at 600 nm after 3, 5 and 7 days of growth. Bars represent the average of two independent experiments, each performed in duplicate. Error bars denote  $\pm$  SEM.
